# Supplementary material
Source: PubMed Central journal article supplement (PMC1236580)
Supplement: pnas_0506735102_3.pdf [file pnas_0506735102_3.pdf]

|       |                                                                                        |       |
|-------|----------------------------------------------------------------------------------------|-------|
|       | ORF3a start                                                                            |       |
| Civet | ATGGATTGTTTATGAGAATTTTTACTCTTGGATCAATTACT-GCACAGCCAGTAAAAATTGACAATGCTTCTCCTGCAAGTACT   | 25336 |
| Human | .....T.....-.....                                                                      | 25351 |
| Bat   | .....C.....C..AT.G...G...C..GC...-..T...CG.....A.....                                  | 25292 |
| Civet | GTTCATGCTACAGCAACGATACCGCTACAAGCCTCACTCCCTTTTCGGATGGCTTGTATTGGCGTGCATTTCTTGCTGTTTTTC   | 25421 |
| Human | .....                                                                                  | 25436 |
| Bat   | .....T.....A.....A..T.....A..G.....C.....                                              | 25377 |
| Civet | AGAGCGCTACCAAAAATAATTGCGCTCAATAAAAGATGGCAGCTAGCCCTTTATAAGGGCTTCCAGTTCATTAGCAATTTACTGCT | 25506 |
| Human | .....T.....                                                                            | 25521 |
| Bat   | .A.....T.T...G.....TC..G...G.....C...T.A....A..G.T..AC.TG.AT.T...A.G.....              | 25462 |
| Civet | GCTATTTGTTACCATCTATTTCATATCTTTTGTCTGTGCTGCAGGTATGGAGGCGCAATTTTGTACCTCTATGCCTTGATATAT   | 25591 |
| Human | .....C.....A.....                                                                      | 25606 |
| Bat   | ...T....G..A..T..C...C.C...C.A...C.A....TT.C....A..A....C.....A.....C...T...           | 25547 |
| Civet | TTTCTACAATGCATCAACGCAGGTAGAATTATTATGAGATGTTGGCTTTGTTGGAAGTGCAAATCCAAGAACCATTACTTTATG   | 25676 |
| Human | .....T.....                                                                            | 25691 |
| Bat   | A.CT.G...ATTG.A.GTTTTT....T....C.....C.....G..C.....G.....A..T.....C....               | 25632 |
| Civet | ATGCCAACTACTTTGTTGTGCTGGCACACACATAACTATGACTACTGTATACCATATAACAGTGTACAGATACAATTGTCGTTAC  | 25761 |
| Human | .....                                                                                  | 25776 |
| Bat   | ...T....T....A..T....T..TA.....C.....G.....A.C...                                      | 25717 |
| Civet | TGAAGGTGACGGCATTTC AACACCAAAACTCAAAGAAGACTACCAAATGGTGGTTATTCTGAGGATAGGCACTCAGGTGTTAAA  | 25846 |
| Human | .....                                                                                  | 25861 |
| Bat   | CTC.....T..A.CAAATCAG.....A.....T.....T.....T.....                                     | 25802 |
| Civet | GACTATGTCGTTGTACATGGCTATTTACCCGAAGTTTACTACCAGCTTGAGTCTACACAAATTACTACAGACTGTTATTGAAA    | 25931 |
| Human | .....                                                                                  | 25946 |
| Bat   | .....A..AA..T.....T.....A..G..T...T.GT.G..T..T.....GC.....                             | 25887 |
| Civet | ATGCTACATTCTTCATCTTTAACAAGCTTGTTAAAGACCCACCGAATGTGCAAATACACACAATCGACGGCTCTTCAGGAGTTGC  | 26016 |
| Human | .....                                                                                  | 26031 |
| Bat   | .....A..G.....TGT.GATC.....T                                                           | 25972 |
| Civet | TAATCCAGCAATGGATCCAATTTATGATGAGCCGACGACGACTACTAGCGTGCCTTTGTAAGCACAAGAAAGTGAAGTACGAACTT | 26101 |
| Human | .....                                                                                  | 26116 |
| Bat   | A.....                                                                                 | 26057 |
|       | ORF3a stop                                                                             |       |
| Civet | ATGTACTCATTTCGTTTCGGAAGAAACAGGTACGTTAA                                                 | 26138 |
| Human | .....                                                                                  | 26153 |
| Bat   | .....G.....                                                                            | 26094 |
|       | ORF3b stop                                                                             |       |
