# Supplementary material
Source: PubMed Central journal article supplement (PMC1236580)
Supplement: pnas_0506735102_4.pdf [file pnas_0506735102_4.pdf]

|          |                                                                            |       |
|----------|----------------------------------------------------------------------------|-------|
| Bat      | ATGAAACTTCTCATTGTTTTTGGACTCTTAGCATCAGTGTACTGCTTCCACAGAGAATGCAGCATACAAGAGTG | 27793 |
| HKU39849 | .....TG..TT-.TC.A.G.A.-.G..T.TGC.C..T...GCGC..                             | 27846 |
| TOR2     | .....TG..TT-.TC.A.G.A.-.G..T.TGC.C..T...GCGC..                             | 27846 |
| CDC      | .....TG..TT-.TC.A.G.A.-.G..T.TGC.C..T...GCGC..                             | 27846 |
| HCSZ6103 | .....TG..TT-.TC.A.G.A.-.G..T.TGC.C..T...GCGC..                             | 27823 |
| PC4-13   | .....TG..TT-.TC.A.G.A.-.G..T.TGC.C..T...GCGC..                             | 27796 |
| SZ16     | .....TG..TT-.TC.A.G.A.-.G..T.TGC.C..T...GCGC..                             | 27831 |

|          |                                                                          |       |
|----------|--------------------------------------------------------------------------|-------|
| Bat      | TTGTGAAAATCAACCTACCAAATGAAGACCCATGTCCAATACATTACTATTCCGACTGGTTTATAAAAATTG | 27867 |
| HKU39849 | .GCATCT..A...TC.TGTGC.....T..T.....GGTACA                                | 27891 |
| TOR2     | .GCATCT..A...TC.TGTGC.....T..T.....GGTACA                                | 27891 |
| CDC      | .GCATCT..A...TC.TGTGC.....T..T.....GGTACA                                | 27891 |
| HCSZ6103 | .GCATCT..A...TC.TGTGC.....T..T.....T.CTGG...C.AC.T..A...AA.....GGTACA    | 27897 |
| PC4-13   | .GCATCT..A...TC.TGTGC.....T..T.....T.CTGG...C.AC.T..A...AA.....GGTACA    | 27870 |
| SZ16     | .GCATCT..A...TC.TGTGC.....T..T.....T.CTGG...C.AC.T..A...AA.....GGTACA    | 27905 |

|          |                                                                            |       |
|----------|----------------------------------------------------------------------------|-------|
| Bat      | GATCTAGAAAATCGGCTCGCCTCGTACAATTGTGCGAAGGTGATTACGGACGAAGAATTCCAATTCATTATGAG | 27941 |
| HKU39849 | ACA...G-----TAATA..TA..GC.C..CTT.GCTT..TGCT.-T.G...AGG..TT.CC.TT.C...-     | 27958 |
| TOR2     | ACA...G-----TAATA..TA..GC.C..CTT.GCTT..TGCT.-T.G...AGG..TT.CC.TT.C...-     | 27958 |
| CDC      | ACA...G-----TAATA..TA..GC.C..CTT.GCTT..TGCT.-T.G...AGG..TT.CC.TT.C...-     | 27958 |
| HCSZ6103 | A.A...G-----TAATA..TA..GC.C..CTT.GCTT..TGCT.-T.G...AGG..TT.CC.TT.C...-     | 27964 |
| PC4-13   | A.A...G-----TAATA..TA..GC.C..CTT.GCTT..TGCT.-T.G...AGG..TT.CC.TT.C...-     | 27937 |
| SZ16     | ACA...G-----TAATA..TA..GC.C..CTT.GCTT..TGCT.-T.G...AGG..TT.CC.TT.C...-     | 27972 |

|          |                                                                           |       |
|----------|---------------------------------------------------------------------------|-------|
| Bat      | ATGTTTGGCAATTACACTATCTCTGTGAACCAC-TAGAGATAAATTGTCAGGCTCCACCAGTAGGTAGTCTAA | 28014 |
| HKU39849 | ...GCACA.T..GGTT.A.A.ATGCACACCTA.TG.TACT..C..C.....A.A...G.T.GT...GCG..T. | 28032 |
| TOR2     | ...GCACA.T..GGTT.A.A.ATGCACACCTA.TG.TACT..C..C.....A.A...G.T.GT...GCG..T. | 28032 |
| CDC      | ...GCACA.T..GGTT.A.A.ATGCACACCTA.TG.TACT..C..C.....A.A...G.T.GT...GCG..T. | 28032 |
| HCSZ6103 | ...GCACA.T..GGTT.A.A.ATGCACACCTA.TG.TACT..C..C.....A.A...G.T.GT...GCG..T. | 28038 |
| PC4-13   | ...GCACA.T..GGTT.A.A.ATGCACACCTA.TG.TACT..C..C.....A.A...G.T.GT...GCG..T. | 28011 |
| SZ16     | ...GCACA.T..GGTT.A.A.ATGCACACCTA.TG.TACT..C..C.....A.A...G.T.GT...GCG..T. | 28046 |

|          |                                                                             |       |
|----------|-----------------------------------------------------------------------------|-------|
| Bat      | TCGTTTCGTTGTTTCATACGATTATGACTTTGTTGAGCATCATGACGTTTCGTTGTTCTAG--ATTTCATCTAAA | 28086 |
| HKU39849 | .A.C.A.G...GG...CT.C...AGG.CACC.AAC.GC..CAT..A.A.AC..A..T.TTG...T.AA...     | 28106 |
| TOR2     | .A.C.A.G...GG...CT.C...AGG.CACC.AAC.GC..CAT..A.A.AC..A..T.TTG...T.AA...     | 28106 |
| CDC      | .A.C.A.G...GG...CT.C...AGG.CACC.AAC.GC..CAT..A.A.AC..A..T.TTG...T.AA...     | 28106 |
| HCSZ6103 | .A.C.A.G...GG...CT.C...AGG.CACC.AAC.GC..CAT..A.A.AC..A..T.TTG...T.AA...     | 28112 |
| PC4-13   | .A.C.A.G...GG...CT.C...AGG.CACC.AAC.GC..CAT..A.A.AC..A..T.TTG...T.AA...     | 28085 |
| SZ16     | .G.C.A.G...GG...CT.C...AGG.CACC.AAC.GC..CAT..A.A.AC..A..T.TTG...T.AA...     | 28120 |

|          |              |       |
|----------|--------------|-------|
| Bat      | CGAACAAACTAA | 28098 |
| HKU39849 | .....T...    | 28118 |
| TOR2     | .....T...    | 28118 |
| CDC      | .....T...    | 28118 |
| HCSZ6103 | .....T...    | 28124 |
| PC4-13   | .....T...    | 28097 |
| SZ16     | .....T...    | 28132 |
