# Supplementary material
Source: PubMed Central journal article supplement (PMC1236580)
Supplement: pnas_0506735102_6.pdf [file pnas_0506735102_6.pdf]

|       |   |   |                     |
|-------|---|---|---------------------|
| 22031 | T |   | A A A A A A A A A A |
| 22040 | C |   | G G G G G G G G G G |
| 22058 | C |   | G G G G G G G G G G |
| 22064 | G |   | C C C C C C C C C C |
| 22070 | C |   | T T T T T T T T T T |
| 22073 | C |   | T T T T T T T T T T |
| 22101 | A |   | C C C C C C C C C C |
| 22103 | A |   | T T T T T T T T T T |
| 22112 | C |   | T T T T T T T T T T |
| 22121 | C |   | T T T T T T T T T T |
| 22136 | A |   | T T T T T T T T T T |
| 22145 | A |   | G G G G G G G G G G |
| 22151 | C |   | T T T T T T T T T T |
| 22157 | A |   | T T T T T T T T T T |
| 22163 | T |   | C C C C C C C       |
| 22166 | C |   | T T T T T T T T T T |
| 22169 | T |   | A A A A A A A A A A |
| 22197 | A |   | T T T T T T T T     |
| 22198 | G |   | C C C C C C C C     |
| 22199 | C |   | A A A A A A A A     |
| 22232 | T |   | A A A A A A A A A A |
| 22235 | T |   | C C C C C C C C C C |
| 22247 | T |   | C C C C C C C C C C |
| 22251 | C |   | T T T T T T T T T T |
| 22253 | T |   | A A A A A A A A A A |
| 22256 | A |   | G G G G G G G G G G |
| 22265 | C |   | A A A A A A A A     |
| 22268 | C |   | T T T T T T T T T T |
| 22292 | G |   | T T T T T T T T T T |
| 22295 | G |   | A A A A A A A A A A |
| 22301 | G |   | A A A A A A A A A A |
| 22310 | A |   | T T T T T T T T T T |
| 22319 | C |   | T T T T T T T T T T |
| 22328 | T |   | A A A A A A A A A A |
| 22338 | T |   | C C C C C C C C C C |
| 22340 | A |   | C C C C C C C C C C |
| 22355 | A |   | G G G G G G G G G G |
| 22361 | C |   | T T T T T T T T T T |
| 22379 | C |   | T T T T T T T T T T |
| 22385 | A |   | G G G G G G G G G G |
| 22388 | A |   | C C C C C C C C C C |
| 22391 | C | T | T T T T T T T T T T |
| 22394 | C |   | T T T T T T T T T T |
| 22400 | A |   | G G G G G G G G G G |
| 22430 | T |   | C C C C C C C C C C |
| 22436 | C |   | T T T T T T T T T T |
| 22445 | T |   | C C C C C C C C C C |
| 22484 | T |   | C C C C C C C C C C |
| 22493 | T |   | C C C C C C C C C C |
| 22508 | A |   | G G G G G           |
| 22517 | C |   | T T T T T T T T T T |
| 22535 | C |   | T T T T T T T T T T |
| 22544 | T |   | G G G G G G G G G G |
| 22559 | C |   | A A A A A A A A A A |
| 22565 | C |   | T T T T T T T T T T |

|       |       |                     |
|-------|-------|---------------------|
| 22568 | G     | A A A A A A A A A A |
| 22571 | T     | C C C C C C C C C C |
| 22577 | A     | G G G G G G G G G G |
| 22580 | T     | C C C C C C C C C C |
| 22586 | A     | C C C C C C C C C C |
| 22589 | G     | T T T T T T T T T T |
| 22610 | C     | T T T T T T T T T T |
| 22613 | A     | T T T T T T T T T T |
| 22619 | T     | C C C C C C C C C C |
| 22628 | G     | C C C C C C C C C C |
| 22634 | T     | A A A A A A A A A A |
| 22643 | C     | T T T T T T T T T T |
| 22676 | A     | G G G G G G G G G G |
| 22682 | T     | A A A A A A A A A A |
| 22703 | C     | T T T T T T T T T T |
| 22706 | C     | T T T T T T T T T T |
| 22712 | C     | T T T T T T T T T T |
| 22715 | G     | A A A A A A A A A A |
| 22721 | T     | A A A A A A A A A A |
| 22736 | C     | T T T T T T T T T T |
| 22742 | A     | C C C C C C C C C C |
| 22775 | C     | T T T T T T T T T T |
| 22787 | C     | T T T T T T T T T T |
| 22790 | A     | G G G G G G G G G G |
| 22797 | C     | A A A A A A A A A A |
| 22799 | C     | A A A A A A A A A A |
| 22809 | T     | C C C C C C C C C C |
| 22811 | A     | T T T T T T T T T T |
| 22817 | T     | C C C C C C C C C C |
| 22838 | T     | C C C C C C C C C C |
| 22847 | T     | C C C C C C C C C C |
| 22863 | C     | T T T T T T T T T T |
| 22865 | C     | A A A A A A A A A A |
| 22904 | T     | C C C C C C C C C C |
| 22907 | G     | A A A A A A A A A A |
| 22916 | G     | A A A A A A A A A A |
| 22922 | T     | A A A A A A A A A A |
| 22928 | C     | T T T T T T T T T T |
| 22941 | C     | T T T T T T T T T T |
| 22943 | T     | A A A A A A A A A A |
| 22952 | T     | G G G G G G G G G G |
| 22955 | T     | C C C C C C C C C C |
| 22958 | A     | G G G G G G G G G G |
| 22970 | T     | A A A A A A A A A A |
| 22982 | A     | T T T T T T T T T T |
| 22988 | A     | T T T T T T T T T T |
| 23006 | T     | C C C C C C C C C C |
| 23012 | C     | T T T T T T T T T T |
| 23018 | C T T | T T T T T T T T T T |
| 23027 | T     | C C C C C C C C C C |
| 23042 | T     | G G G G G G G G G G |
| 23045 | G     | A A A A A A A A A A |
| 23060 | A     | G G G G G G G G G G |
| 23066 | C     | T T T T T T T T T T |
| 23069 | G     | A A A A A A A A A A |

|       |   |   |                     |
|-------|---|---|---------------------|
| 23087 | T |   | C C C C C C C C C C |
| 23093 | C |   | T T T T T T T T T T |
| 23102 | C |   | T T T T T T T T T T |
| 23105 | T |   | C C C C C C C C C   |
| 23108 | G |   | T T T T T T T T T T |
| 23114 | A |   | C C C C C C C C C C |
| 23117 | A |   | T T T T T T T T T T |
| 23120 | T |   | A A A A A A A A A A |
| 23123 | C |   | T T T T T T T T T T |
| 23126 | A |   | T T T T T T T T T T |
| 23132 | T |   | A A A A A A A A A A |
| 23142 | C |   | T T T T T T T T T T |
| 23144 | T |   | A A A A A A A A A A |
| 23159 | T |   | C C C C C C C C C C |
| 23162 | C |   | T T T T T T T T T T |
| 23168 | T |   | G G G G G G G G G G |
| 23174 | T |   | A A A A A A A A A A |
| 23180 | T |   | A A A A A A A A A A |
| 23183 | C |   | T T T T T T T T T T |
| 23195 | G |   | A A A A A A A A A A |
| 23198 | C | T | T T T T T T T T T T |
| 23201 | C |   | T T T T T T T T T T |
| 23207 | A |   | T T T T T T T T T T |
| 23210 | G |   | A A A A A A A A A A |
| 23213 | A |   | T T T T T T T T T T |
| 23222 | C |   | A A A A A A A A A A |
| 23234 | A |   | T T T T T T T T T T |
| 23237 | T |   | C C C C C C C C C C |
| 23249 | C |   | T T T T T T T T T T |
| 23261 | A |   | T T T T T T T T T T |
| 23274 | T |   | C C C C C C C C C C |
| 23276 | A |   | C C C C C C C C C C |
| 23282 | T |   | A A A A A A A A A A |
| 23300 | C |   | T T T T T T T T T T |
| 23315 | G |   | A A A A A A A A A A |
| 23318 | T |   | C C C C C C C C C C |
| 23321 | A |   | G G G G G G G G G G |
| 23324 | A |   | T T T T T T T T T T |
| 23330 | T |   | A A A A A A A A A A |
| 23375 | T |   | C C C C C C C C C C |
| 23390 | T |   | A A A A A A A A A A |
| 23393 | A |   | T T T T T T T T T T |
| 23427 | C | T | T T T T T T T T T T |
| 23438 | C |   | T T T T T T T T T T |
| 23444 | G |   | A A A A A A A A A A |
| 23450 | A |   | T T T T T T T T T T |
| 23456 | T |   | G G G G G G G G G G |
| 23459 | C |   | T T T T T T T T T T |
| 23471 | A |   | T T T T T T T T T T |
| 23472 | C |   | T T T T T T T T T T |
| 23474 | G |   | A A A A A A A A A A |
| 23489 | C |   | A A A A A A A A A A |
| 23495 | A |   | T T T T T T T T T T |
| 23507 | T |   | C C C C C C C C C C |
| 23516 | C |   | T T T T T T T T T T |







|       |   |   |   |   |   |   |   |   |   |   |   |   |
|-------|---|---|---|---|---|---|---|---|---|---|---|---|
| 24971 | T |   |   |   |   |   |   |   |   | C | C | C |
| 24977 | C | T | T | T | T | T | T | T | T | T | T | T |
| 24984 | C | T | T | T | T | T | T | T | T | T | T | T |
| 24986 | T | G | G | G | G | G | G | G | G | G | G | G |
| 24989 | G | A | A | A | A | A | A | A | A | A | A | A |
| 25004 | C | T | T | T | T | T | T | T | T | T | T | T |
| 25007 | C | T | T | T | T | T | T | T | T | T | T | T |
| 25010 | G | A | A | A | A | A | A | A | A | A | A | A |
| 25037 | T | C | C | C | C | C | C | C | C | C | C | C |
| 25091 | C | T | T | T | T | T | T | T | T | T | T | T |
| 25094 | C | T | T | T | T | T | T | T | T | T | T | T |
| 25106 | T | C | C | C | C | C | C | C | C | C | C | C |
| 25133 | G | T | T | T | T | T | T | T | T | T | T | T |
| 25142 | A | G | G | G | G | G | G | G | G | G | G | G |
| 25154 | C | T | T | T | T | T | T | T | T | T | T | T |
| 25169 | G | T | T | T | T | T | T | T | T | T | T | T |
| 25175 | A | G | G | G | G | G | G | G | G | G | G | G |
| 25178 | A | T | T | T | T | T | T | T | T | T | T | T |

---

\* The nucleotide positions are based on bat SARS-CoV B24 (GenBank accession no.

DQ022305). Blank indicates nucleotides identical to those of B24.
