# Supplementary material
Source: PubMed Central journal article supplement (PMC1236580)
Supplement: pnas_0506735102_7.pdf [file pnas_0506735102_7.pdf]

|       |   |   |                     |           |
|-------|---|---|---------------------|-----------|
| 22908 | G |   | C C C C C C C C C C |           |
| 22911 | A |   | T T T T T T T T T T |           |
| 22912 | C |   | A A A A A A A A A A |           |
| 22913 | T |   | C C C C C C C C C C |           |
| 22985 | A |   | C C C C C C C C C C |           |
| 22989 | G |   | A A A A A A A A A A |           |
| 23029 | A |   | C C C C C C C C C C |           |
| 23030 | A |   | T T T T T T T T T T |           |
| 23049 | T |   | C C C C C C C C C C |           |
| 23070 | T |   | C C C C C C C C C C |           |
| 23094 | A |   | G G G G G G G G G G |           |
| 23095 | C |   | T T T T T T T T T T |           |
| 23096 | A |   | T T T T T T T T T T |           |
| 23103 | T |   |                     | A         |
| 23105 | T |   |                     | C         |
| 23127 | C |   | A A A A A A A A A A |           |
| 23129 | G |   | A A A A A A A A A A |           |
| 23134 | T |   | C C C C C C C C C C |           |
| 23135 | A |   | T T T T T T T T T T |           |
| 23160 | T |   | G                   |           |
| 23162 | C |   | T                   |           |
| 23250 | C |   | T T T T T T T T     |           |
| 23256 | G |   |                     | T T T     |
| 23257 | C |   |                     | T T T     |
| 23263 | G |   | A A A A A A A A A A |           |
| 23270 | T |   |                     | A A A     |
| 23292 | G |   | A A A A A A A A A A |           |
| 23294 | T |   | A A A A A A A A A A |           |
| 23307 | G |   | A A A A A A A A A A |           |
| 23308 | T |   | A A A A A A A A A A |           |
| 23309 | A |   | C C C C C C C C C C |           |
| 23358 | A |   | G G G G G G G G G G |           |
| 23361 | G |   | A A A A A A A A A A |           |
| 23363 | C |   | T T T T T T T T T T |           |
| 23385 | A |   | G                   |           |
| 23419 | C |   | T T T T T T T T T T |           |
| 23422 | C | T |                     |           |
| 23424 | G |   | T T T T T T T T T T |           |
| 23425 | T |   |                     | C C C C C |
| 23426 | T |   | A A A A A A A A A A |           |
| 23439 | G |   | A A A A A A A A A A |           |
| 23483 | A |   | T T T T T T T T T T |           |
| 23485 | A |   | G G G G G G G G G G |           |
| 23499 | G |   | T T T T T T T T T T |           |
| 23508 | T |   | A A A A A A A A A A |           |
| 23510 | A |   | C C C C C C C C C C |           |
| 23533 | C |   |                     | T T       |
| 23541 | G |   | A A A A A A A A A A |           |
| 23543 | C |   | T T T T T T T T T T |           |
| 23580 | G |   | T T T T T T T T T T |           |
| 23593 | C |   | A A A A A A A A A A |           |
| 23616 | T |   | A A A A A A A A A A |           |
| 23617 | T |   | C C C C C C C C C C |           |
| 23618 | A |   | T T T T T T T T T T |           |
| 23625 | A |   | G G G G G G G G G G |           |



|       |   |   |   |   |   |   |   |   |   |   |   |   |   |   |
|-------|---|---|---|---|---|---|---|---|---|---|---|---|---|---|
| 23626 | G | C | C | C | C | C | C | C | C | C | C | C | C | C |
| 23627 | C | T | T | T | T | T | T | T | T | T | T | T | T | T |
| 23658 | A |   |   |   |   |   |   |   |   |   |   |   | G | G |
| 23659 | C |   |   |   |   |   |   | G | G | G |   |   |   |   |
| 23679 | A | T | T | T | T | T | T | T | T | T | T | T | T | T |
| 23681 | T | A | A | A | A | A | A | A | A | A | A | A | A | A |
| 23691 | A | G | G | G | G | G | G | G | G | G | G | G | G | G |
| 23692 | T | C | C | C | C | C | C | C | C | C | C | C | C | C |
| 23693 | A | T | T | T | T | T | T | T | T | T | T | T | T | T |
| 23703 | A | C | C | C | C | C | C | C | C | C | C | C | C | C |
| 23704 | A | G | G | G | G | G | G | G | G | G | G | G | G | G |
| 23705 | A | C | C | C | C | C | C | C | C | C | C | C | C | C |
| 23713 | A | G | G | G | G | G | G | G | G | G | G | G | G | G |
| 23714 | G | T | T | T | T | T | T | T | T | T | T | T | T | T |
| 23725 | C |   |   |   |   |   |   | T | T | T |   |   |   |   |
| 23726 | C |   |   |   |   |   |   | T | T | T |   |   |   |   |
| 23754 | G | A | A | A | A | A | A | A | A | A | A | A | A | A |
| 23756 | C | T | T | T | T | T | T | T | T | T | T | T | T | T |
| 23757 | A | T | T | T | T | T | T | T | T | T | T | T | T | T |
| 23759 | A | G | G | G | G | G | G | G | G | G | G | G | G | G |
| 23763 | G | T | T | T | T | T |   |   |   |   |   |   |   |   |
| 23765 | C | T | T | T | T | T |   |   |   |   |   |   |   |   |
| 23805 | T | C | C | C | C | C | C | C | C | C | C | C | C | C |
| 23806 | C | T | T | T | T | T | T | T | T | T | T | T | T | T |
| 23894 | C | A | A | A | A | A | A | A | A | A | A | A | A | A |
| 23907 | G | A | A | A | A | A | A | A | A | A | A | A | A | A |
| 23911 | G | A | A | A | A | A | A | A | A | A | A | A | A | A |
| 23981 | G | T | T | T | T | T | T | T | T | T | T | T | T | T |
| 23985 | G | A | A | A | A | A | A | A | A | A | A | A | A | A |
| 24111 | A |   |   |   |   |   |   |   |   |   |   |   | G | G |
| 24113 | T |   |   |   |   |   |   |   |   |   |   |   | C | C |
| 24142 | T | A | A | A | A | A | A | A | A | A | A | A | A | A |
| 24143 | G | A | A | A | A | A | A | A | A | A | A | A | A | A |
| 24163 | G | A | A | A | A | A | A | A | A | A | A | A | A | A |
| 24164 | T | G | G | G | G | G | G | G | G | G | G | G | G | G |
| 24171 | G | A | A | A | A | A | A | A | A | A | A | A | A | A |
| 24173 | C | T | T | T | T | T | T | T | T | T | T | T | T | T |
| 24174 | A | C | C | C | C | C | C | C | C | C | C | C | C | C |
| 24192 | T | A | A | A | A | A | A | A | A | A | A | A | A | A |
| 24195 | T | A | A | A | A | A | A | A | A | A | A | A | A | A |
| 24197 | T | A | A | A | A | A | A | A | A | A | A | A | A | A |
| 24201 | G | T | T | T | T | T | T | T | T | T | T | T | T | T |
| 24205 | G | C | C | C | C | C | C | C | C | C | C | C | C | C |
| 24540 | T | G | G | G | G | G | G | G | G | G | G | G | G | G |
| 24595 | A | G | G | G | G | G | G | G | G | G | G | G | G | G |
| 24596 | A | G | G | G | G | G | G | G | G | G | G | G | G | G |
| 24667 | C | T | T | T | T | T | T | T | T | T | T | T | T | T |
| 24670 | A |   |   |   |   |   |   |   |   | G |   |   |   |   |
| 24706 | A | T | T | T | T | T | T | T | T | T | T | T | T | T |
| 24707 | C | T | T | T | T | T | T | T | T | T | T | T | T | T |
| 24717 | T | A | A | A | A | A | A | A | A | A | A | A | A | A |
| 24873 | C |   |   |   |   |   |   |   |   |   |   |   |   | T |
| 24918 | A |   |   |   |   |   |   |   |   | G | G | G | G | G |
| 24920 | G |   |   |   |   |   |   |   |   | A | A | A | A | A |

---

† The nucleotide positions are based on bat SARS-CoV B24 (GenBank accession no. DQ022305). Blank indicates nucleotides identical to those of B24.
