# Supplementary material
Source: PubMed Central journal article supplement (PMC1236580)
Supplement: pnas_0506735102_8.pdf [file pnas_0506735102_8.pdf]

**Table 8. Nucleotide and amino acid sequence variations of the S genes of bat-SARS-CoV. ‡**

| Positions  | S                             |                               |                               |                               |                               |                               |                               |                               |
|------------|-------------------------------|-------------------------------|-------------------------------|-------------------------------|-------------------------------|-------------------------------|-------------------------------|-------------------------------|
|            | 21567                         | 22391                         | 23018                         | 23198                         | 23422                         | 23427                         | 23765                         | 24932                         |
| B24        |                               |                               |                               |                               |                               |                               |                               | A                             |
| B40        |                               |                               | T                             |                               |                               |                               |                               |                               |
| B41        |                               |                               | T                             |                               | T                             | T                             |                               |                               |
| B43        |                               |                               |                               |                               |                               |                               |                               | A                             |
| B45        |                               |                               |                               |                               |                               |                               | T                             |                               |
| B46        |                               | T                             |                               | T                             |                               |                               |                               |                               |
| B47        |                               |                               |                               |                               |                               |                               |                               |                               |
| B48        |                               |                               |                               |                               |                               |                               | T                             |                               |
| B51        |                               |                               |                               |                               |                               |                               | T                             |                               |
| B53        |                               |                               |                               |                               |                               |                               |                               | A                             |
| B55        |                               |                               |                               |                               |                               |                               |                               |                               |
| B56        |                               |                               |                               |                               |                               |                               |                               | A                             |
| B60        | T                             |                               |                               |                               |                               |                               |                               |                               |
| B61        |                               |                               |                               |                               |                               |                               |                               |                               |
| Codon      | <u>GTC</u><br>↓<br><u>TTC</u> | <u>TCC</u><br>↓<br><u>TCT</u> | <u>TTC</u><br>↓<br><u>TTT</u> | <u>AAC</u><br>↓<br><u>AAT</u> | <u>TCT</u><br>↓<br><u>TTT</u> | <u>CTA</u><br>↓<br><u>TTA</u> | <u>GAC</u><br>↓<br><u>GAT</u> | <u>CGC</u><br>↓<br><u>CGA</u> |
| amino acid | V<br>↓<br>F                   | S                             | F                             | N                             | S<br>↓<br>F                   | L                             | D                             | R                             |

‡ The nucleotides with variations are underlined. Blank indicates the alternative nucleotides used by the majority
