# Supplementary material
Source: PubMed Central journal article supplement (PMC1236580)

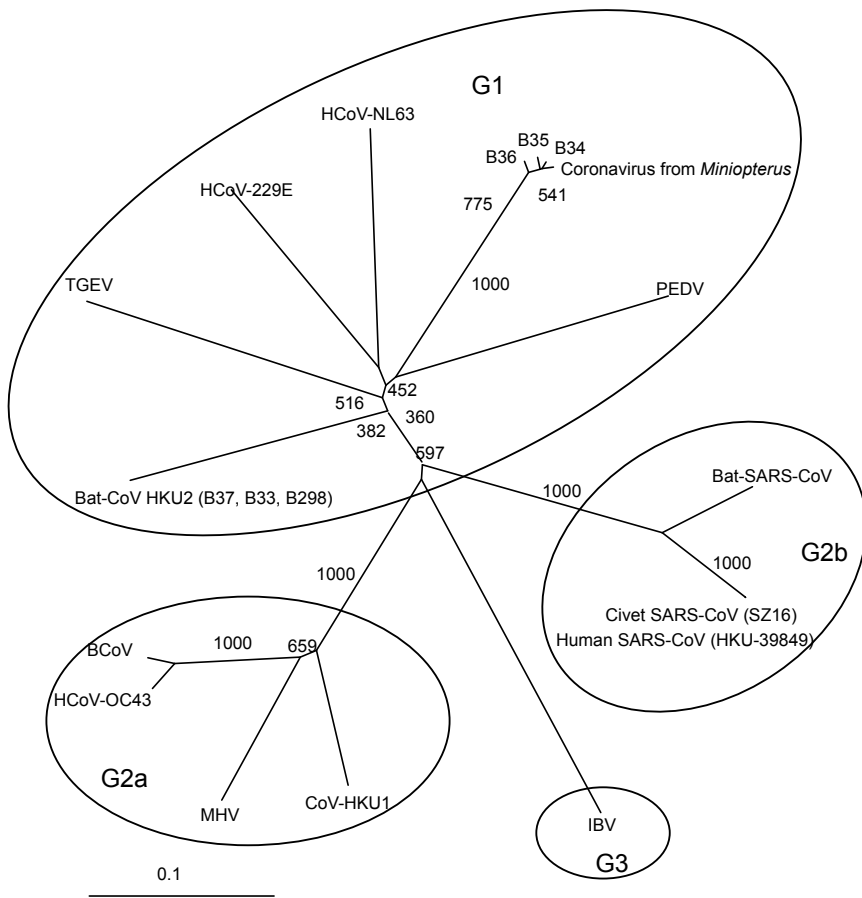

Supplement: pnas_0506735102_1.pdf [file pnas_0506735102_1.pdf]

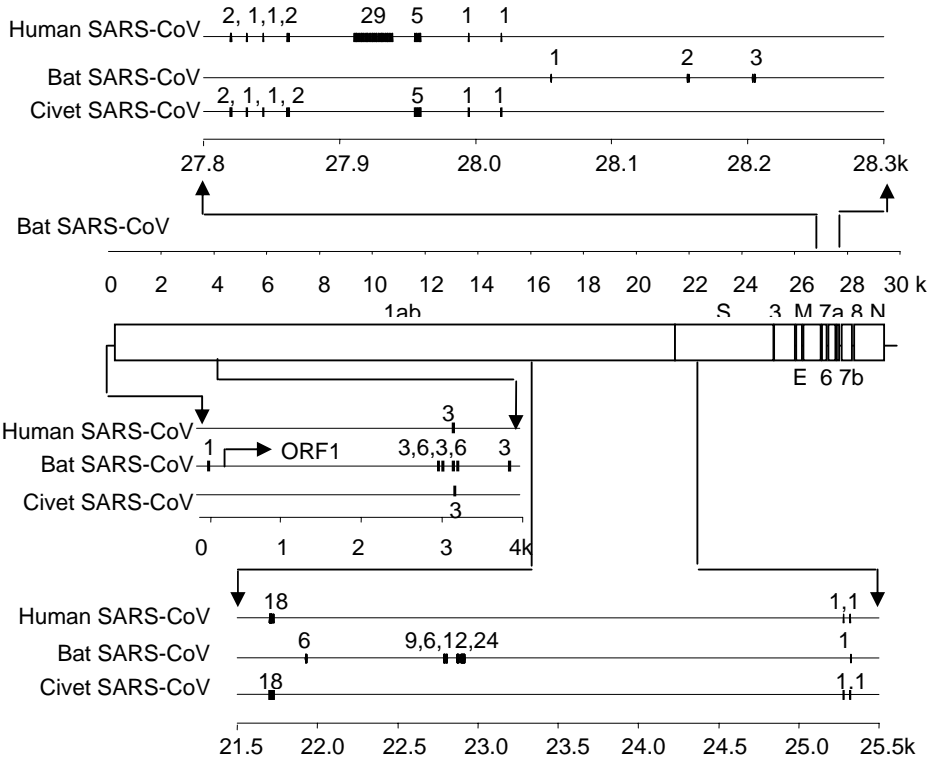

Supplement: pnas_0506735102_2.pdf [file pnas_0506735102_2.pdf]

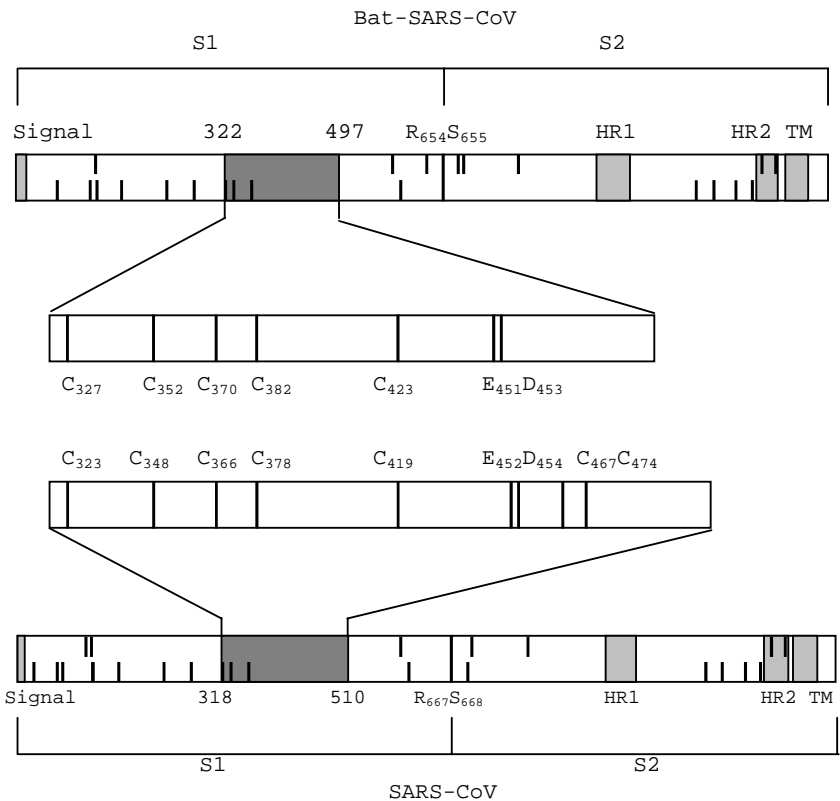

Supplement: pnas_0506735102_5.pdf [file pnas_0506735102_5.pdf]
